# Supplementary material for: Spatiotemporal and Environmental Effects on Demersal Fishes Along the Nearshore Texas Continental Shelf
Source: MDPI journal article supplement (doi:10.3390/fishes10120632), 2025-12-09
Supplement: s1 [file Supplementary Figures.pdf › Supplementary Figures.pdf]

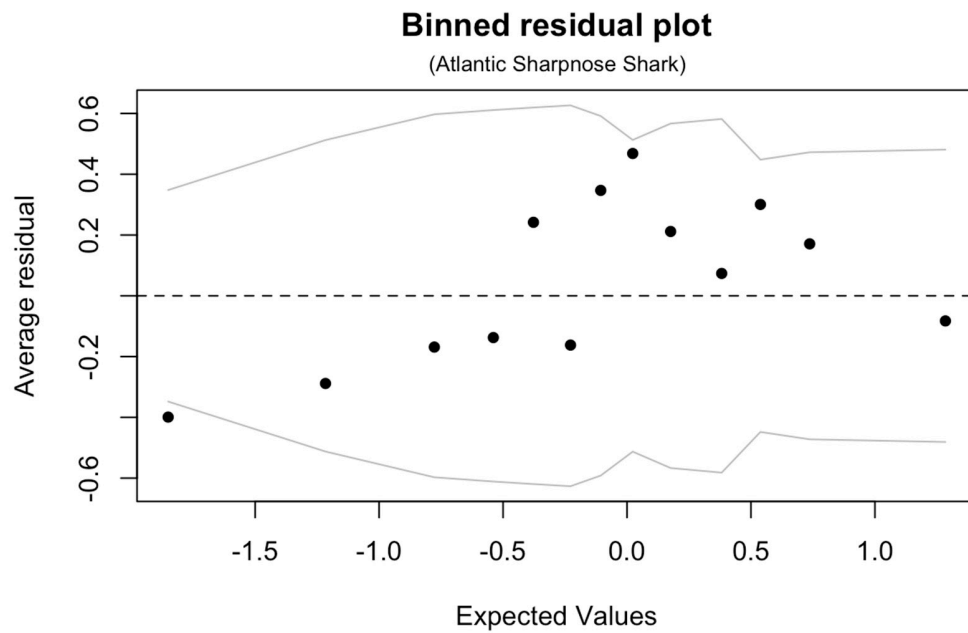

**Figure S1** Binned residual plot from logistic regression analysis for Atlantic Sharpnose Shark.

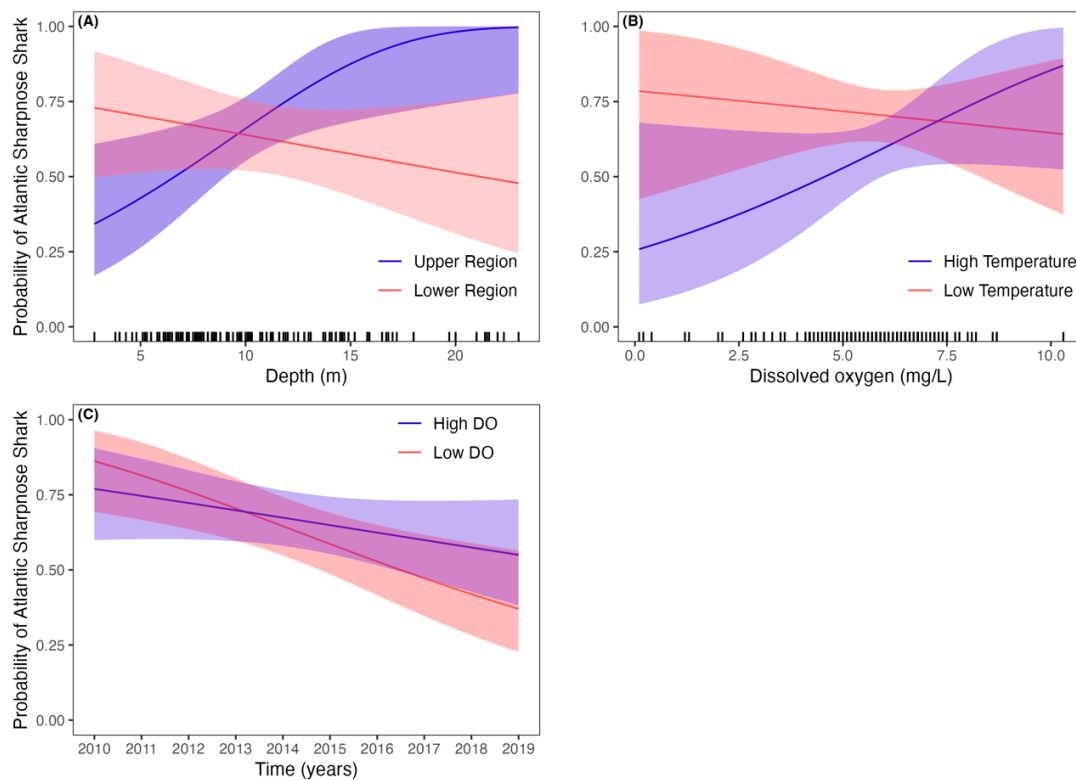

**Figure S2** Presence probability of Atlantic Sharpnose Sharks as predicted by the interactions between (A) depth and region, (B) dissolved oxygen and temperature, and (C) time and dissolved oxygen. Polygons indicate 95% confidence intervals.

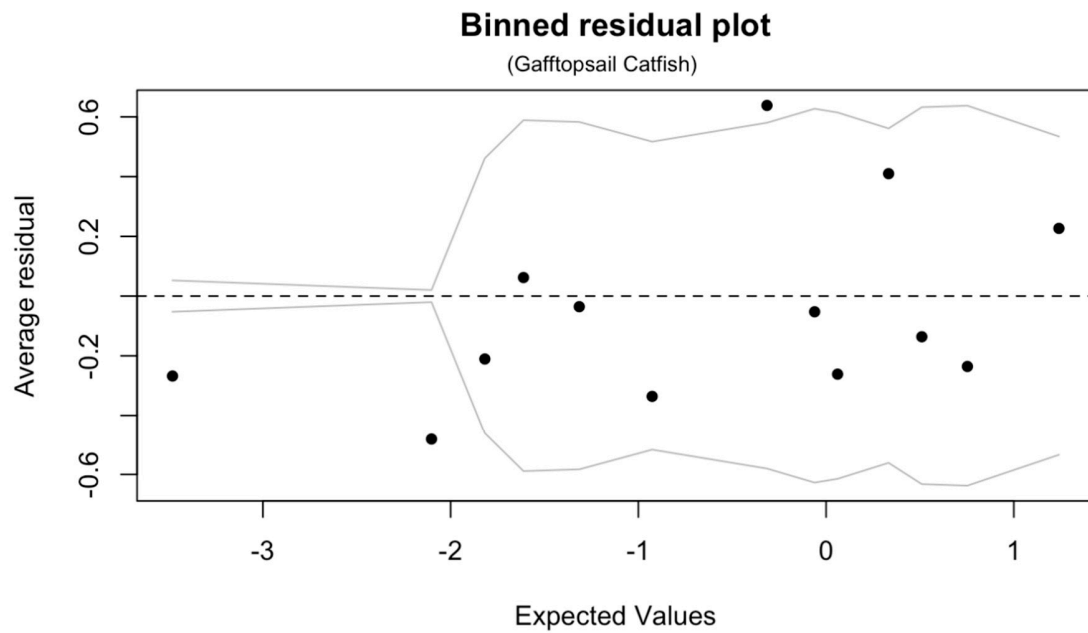

**Figure S3** Binned residual plot from logistic regression analysis for Gafftopsail Catfish.

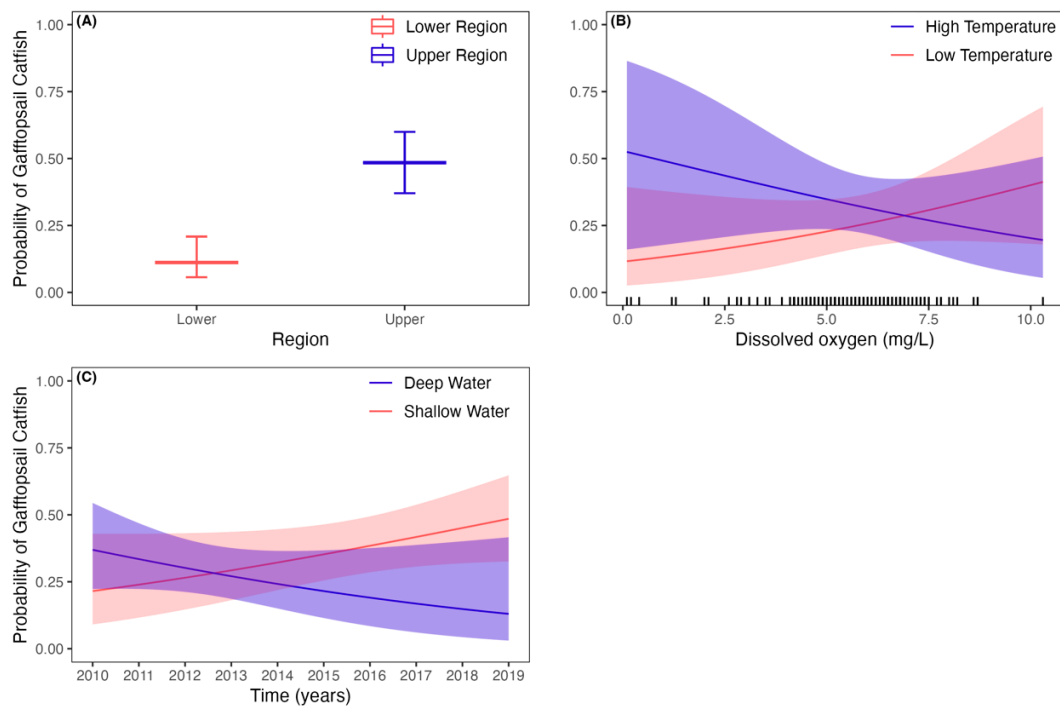

**Figure S4** Presence probability of Gafftopsail Catfish predicted by (A) region, and the interactions between (B) dissolved oxygen and temperature and (C) time and depth. Polygons and error bars indicate 95% confidence intervals.

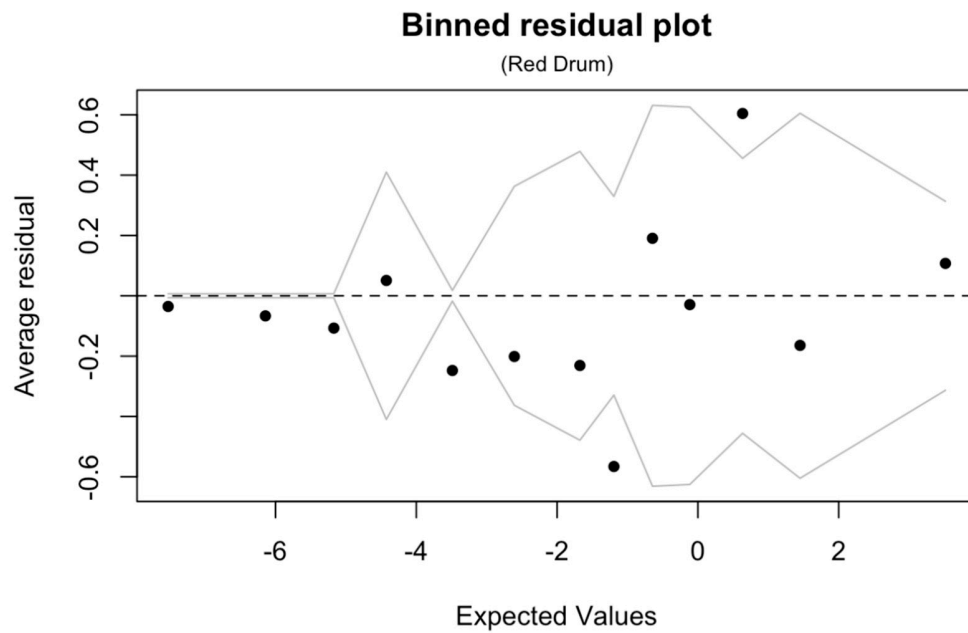

**Figure S5** Binned residual plot from logistic regression analysis for Red Drum.

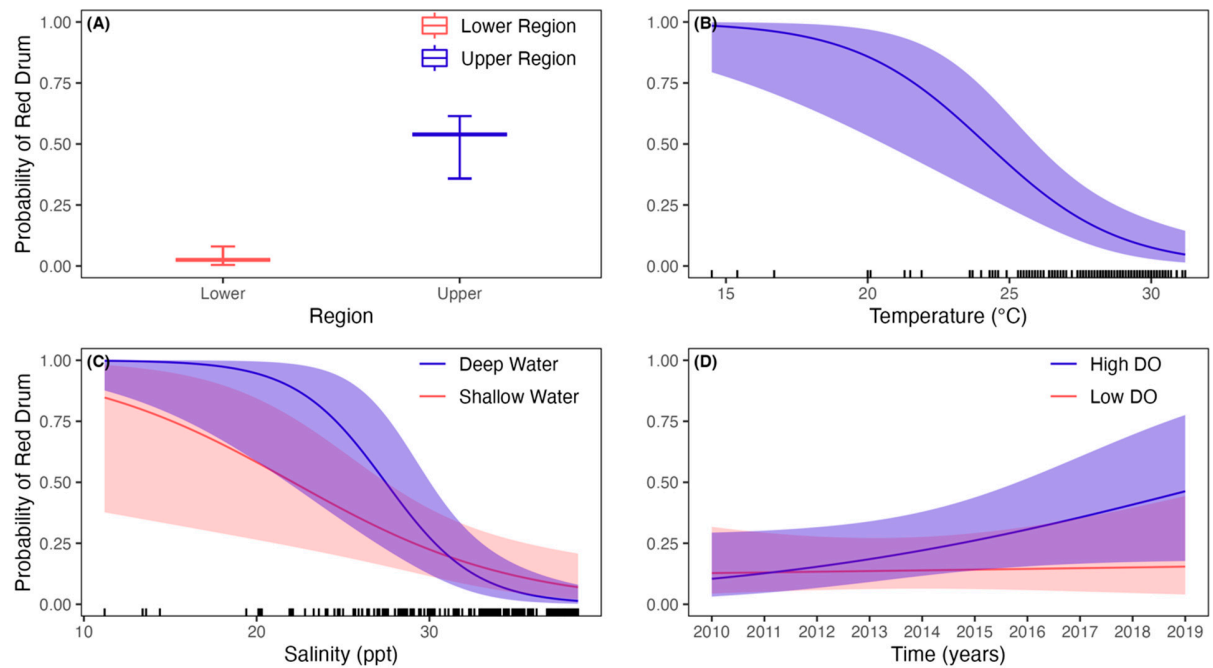

**Figure S6** Presence probability of Red Drum predicted by (A) region, (B) temperature and the interactions between (D) salinity and depth and (E) time and dissolved oxygen. Polygons and error bars indicate 95% confidence intervals.

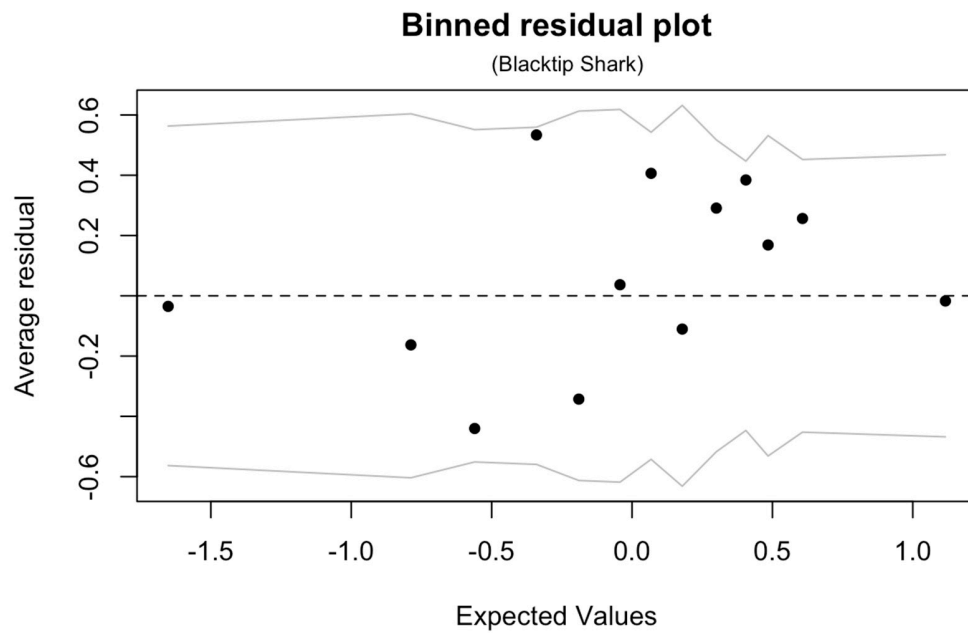

**Figure S7** Binned residual plot from logistic regression analysis for Blacktip Shark.

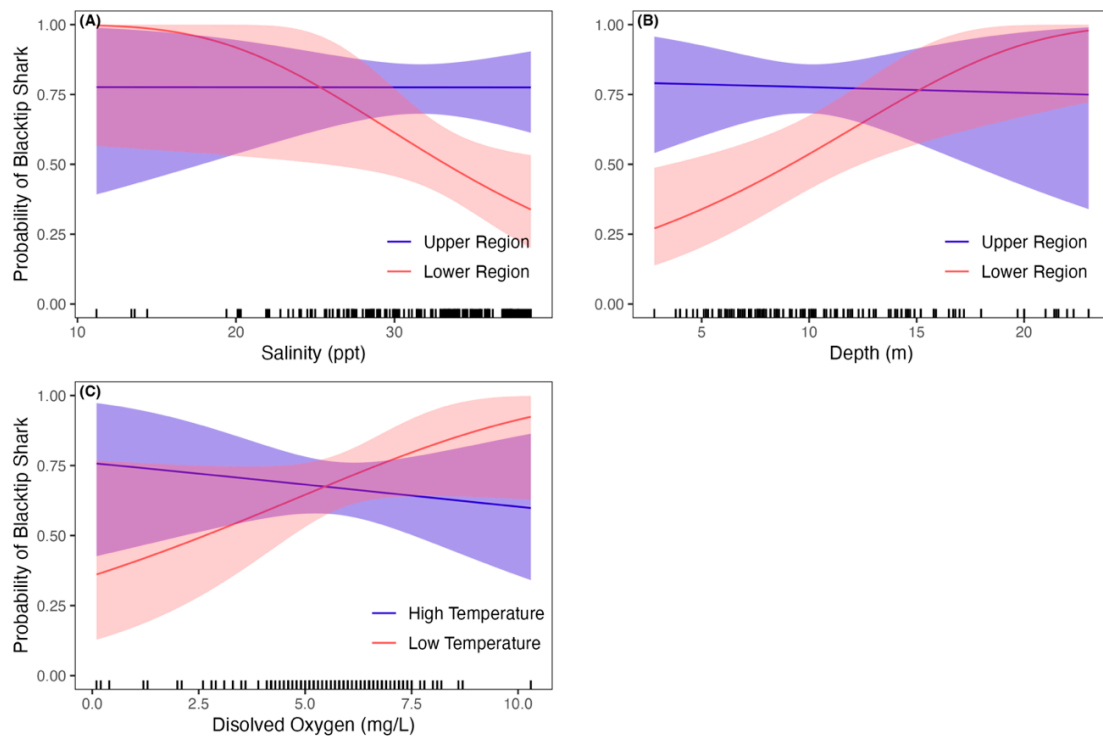

**Figure S8** Blacktip Shark presence probability predicted by interactions between (A) salinity and region, (B) depth and region, and (C) dissolved oxygen and temperature. Polygons indicate 95% confidence intervals.

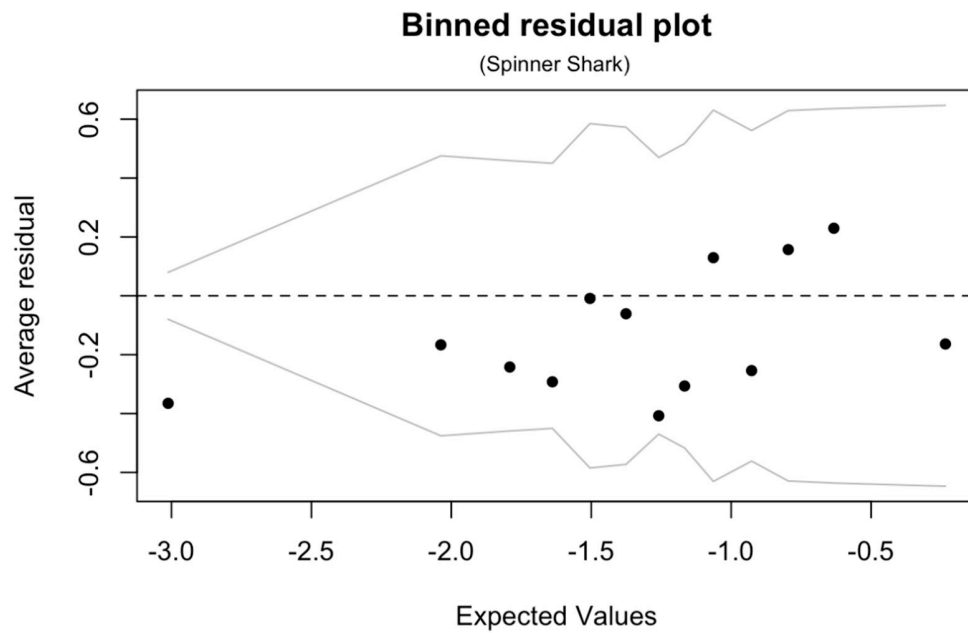

**Figure S9** Binned residual plot from logistic regression analysis for Spinner Shark.

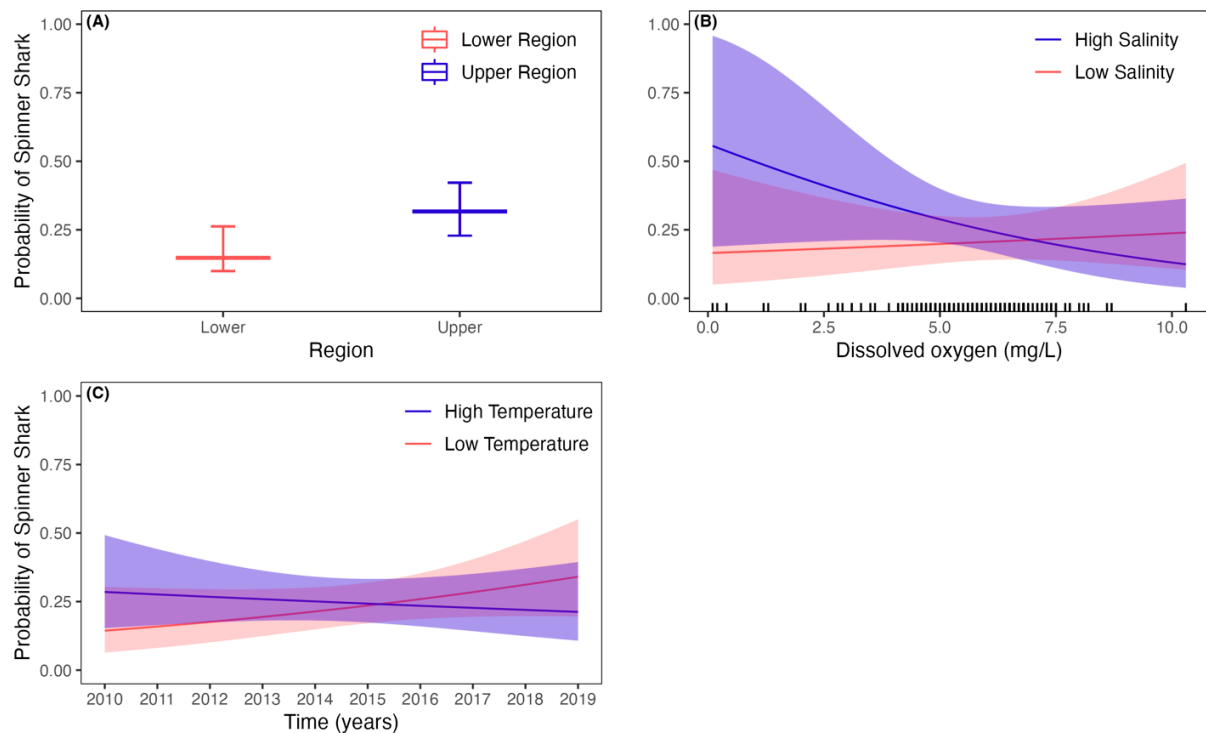

**Figure S10** Spinner Shark presence probability predicted by (A) region, (B) the interactions between dissolved oxygen and salinity and (C) time and temperature. Polygons indicate 95% confidence intervals.

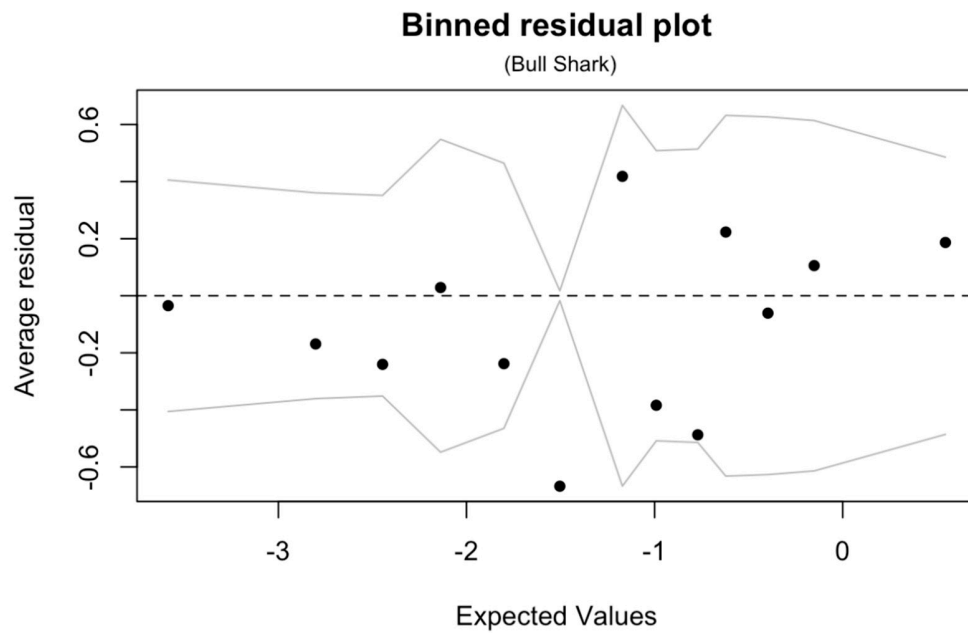

**Figure S11** Binned residual plot from logistic regression analysis for Bull Shark.

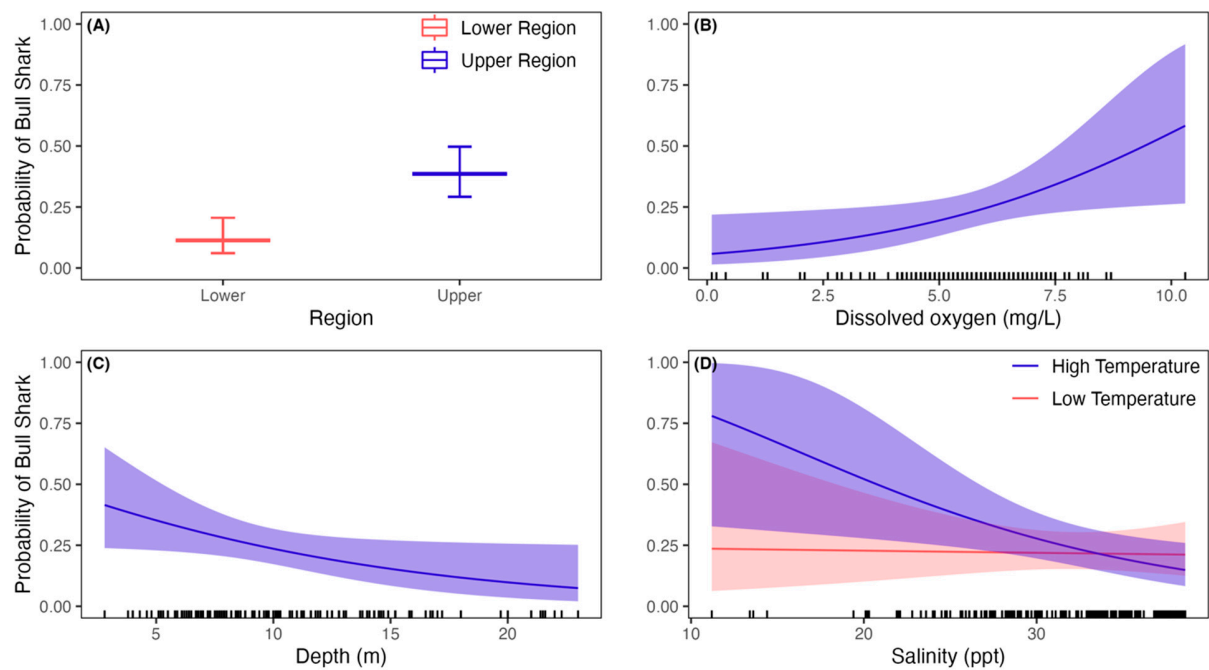

**Figure S12** Bull Shark presence probability predicted by (A) region, (B) dissolved oxygen, (C) depth, and (D) the interaction between salinity and temperature. Polygons indicate 95% confidence intervals.
