# Supplementary material for: Spatiotemporal and Environmental Effects on Demersal Fishes Along the Nearshore Texas Continental Shelf
Source: MDPI journal article supplement (doi:10.3390/fishes10120632), 2025-12-09
Supplement: s1 [file Supplementary Tables.pdf › Supplementary Tables.pdf]

# Supplementary Information (SI)

|                           | Environmental Parameters |             |                  |       |
|---------------------------|--------------------------|-------------|------------------|-------|
|                           | Salinity                 | Temperature | Dissolved Oxygen | Depth |
|                           | (‰)                      | (°C)        | (mg/L)           | (m)   |
| Minimum                   | 11.20                    | 14.50       | 0.10             | 2.80  |
| 25 <sup>th</sup> quartile | 28.30                    | 26.90       | 4.90             | 7.30  |
| Mean                      | 31.67                    | 27.83       | 5.681            | 10.39 |
| 75 <sup>th</sup> quartile | 35.90                    | 29.40       | 6.60             | 12.80 |
| Maximum                   | 38.60                    | 31.20       | 10.30            | 23.00 |

**Table S1** Summary of environmental parameters measured throughout survey.

| <i>Models</i> | <i>AICc</i> | <i>Delta_AICc</i> |
|---------------|-------------|-------------------|
| model 4       | 568.098     | 0                 |
| model 3       | 569.197     | 1.099             |
| model 2       | 571.434     | 3.335             |
| model 1       | 573.865     | 5.767             |

**Table S2** AICc table of models for species richness analysis.

| Component                  | Term        | Estimate | Std Error | t-value | p-value |     |
|----------------------------|-------------|----------|-----------|---------|---------|-----|
| A. parametric coefficients | (Intercept) | 3.124    | 0.072     | 43.298  | 0.0000  | *** |
|                            | Term        | edf      | Ref. df   | F-value | p-value |     |
| B. smooth terms            | s(year)     | 1.000    | 1.000     | 2.544   | 0.113   |     |
|                            | s(do)       | 4.978    | 5.605     | 2.132   | 0.062   |     |
|                            | s(temp)     | 3.773    | 4.509     | 3.359   | 0.007   | **  |
|                            | s(catch)    | 4.218    | 4.963     | 56.818  | 0.000   | *** |

Signif. codes: 0 <= '\*\*\*' < 0.001 < '\*\*' < 0.01 < '\*' < 0.05

**Table S3** GAM output for final model of species richness.

| <i>Models</i> | <i>AICc</i> | <i>Delta_AICc</i> |
|---------------|-------------|-------------------|
| model 4       | 172.836     | 0                 |
| model 3       | 174.013     | 1.1774            |
| model 2       | 181.077     | 8.241             |
| model 1       | 184.056     | 12.043            |

**Table S4** AICc table of models for species diversity analysis.

| Component                  | Term        | Estimate | Std Error | t-value | p-value |     |
|----------------------------|-------------|----------|-----------|---------|---------|-----|
| A. parametric coefficients | (Intercept) | 0.751    | 0.026     | 29.427  | 0.0000  | *** |
|                            | Term        | edf      | Ref. df   | F-value | p-value |     |
| B. smooth terms            | s(salinity) | 3.358    | 4.059     | 1.983   | 0.095   |     |
|                            | s(do)       | 4.929    | 5.571     | 2.319   | 0.049   | *   |
|                            | s(temp)     | 2.712    | 3.337     | 2.135   | 0.105   |     |
|                            | s(catch)    | 7.233    | 8.198     | 16.259  | 0.000   | *** |

Signif. codes: 0 <= '\*\*\*' < 0.001 < '\*\*' < 0.01 < '\*' < 0.05

**Table S5** GAM output for final model of species diversity.

| <i>Models</i>  | <i>AICc</i> | <i>Delta_AICc</i> |
|----------------|-------------|-------------------|
| model 2        | -305.916    | 0                 |
| model 1 (full) | -302.150    | 3.766             |

**Table S6** AICc table of models for relative abundance analysis.

| Component                  | Term        | Estimate | Std Error | t-value | p-value |     |
|----------------------------|-------------|----------|-----------|---------|---------|-----|
| A. parametric coefficients | (Intercept) | 0.070    | 0.012     | 5.933   | 0.0000  | *** |
|                            | regionUpper | 0.132    | 0.017     | 7.929   | 0.0000  | *** |
| Component                  | Term        | edf      | Ref. df   | F-value | p-value |     |
| B. smooth terms            | s(year)     | 7.916    | 8.713     | 2.330   | 0.026   | *   |
|                            | s(salinity) | 1.002    | 1.005     | 4.916   | 0.028   | *   |
|                            | s(temp)     | 2.249    | 2.765     | 1.834   | 0.195   |     |
|                            | s(depth)    | 3.058    | 3.698     | 2.823   | 0.043   | *   |

Significant codes: 0 <= '\*\*\*' < 0.001 < '\*\*' < 0.01 < '\*' < 0.05

**Table S7** GAM output of final for relative abundance

| <i>Models</i> | <i>K</i> | <i>AICc</i> | <i>Delta_AICc</i> | <i>ModelLik</i> | <i>AICcWt</i> | <i>LL</i> | <i>Cum.Wt</i> |
|---------------|----------|-------------|-------------------|-----------------|---------------|-----------|---------------|
| model 1       | 12       | 233.449     | 0.000             | 1.000           | 0.534         | -103.858  | 0.534         |
| model 2       | 11       | 233.721     | 0.272             | 0.873           | 0.466         | -105.131  | 0.999         |
| full          | 22       | 248.531     | 15.082            | 0.001           | 0.0002        | -99.289   | 1.000         |

**Table S8** AICc table of logistic regression models for Atlantic Sharpnose Shark.

|                    | Estimate | Standard Error | z value | Pr(> z ) |    |
|--------------------|----------|----------------|---------|----------|----|
| (Intercept)        | 894.415  | 359.275        | 2.490   | 0.0128   | *  |
| fregionUpper:depth | 0.166    | 0.058          | 2.855   | 0.0043   | ** |
| sal:do             | 0.030    | 0.020          | 1.507   | 0.1319   |    |
| temp:do            | 0.091    | 0.037          | 2.473   | 0.0134   | *  |
| year:do            | 0.055    | 0.029          | 1.925   | 0.0542   |    |

Significant codes: 0 <= '\*\*\*' < 0.001 < '\*\*' < 0.01 < '\*' < 0.05

**Table S9** GLM output of final model for Atlantic Sharpnose Shark.

| <i>Models</i> | <i>K</i> | <i>AICc</i> | <i>Delta_AICc</i> | <i>ModelLik</i> | <i>AICcWt</i> | <i>LL</i> | <i>Cum.Wt</i> |
|---------------|----------|-------------|-------------------|-----------------|---------------|-----------|---------------|
| model 1       | 10       | 228.157     | 0.000             | 1.000           | 5.064e-01     | -103.474  | 0.506         |
| model 2       | 9        | 228.208     | 0.051             | 0.975           | 4.937e-01     | -104.612  | 0.999         |
| full          | 22       | 252.289     | 24.132            | 5.753e-06       | 2.913e-06     | -101.168  | 1.000         |

**Table S10** AICc table of logistic regression models for Gafftopsail Catfish.

|              | Estimate   | Standard Error | z value | Pr(> z ) |     |
|--------------|------------|----------------|---------|----------|-----|
| (Intercept)  | -1,063.463 | 422.069        | -2.520  | 0.0117   | *   |
| fregionUpper | 2.011      | 0.386          | 5.214   | 0.0000   | *** |
| temp:do      | -0.125     | 0.050          | -2.478  | 0.0132   | *   |
| temp:depth   | 0.035      | 0.019          | 1.806   | 0.0709   |     |
| year:depth   | -0.052     | 0.022          | -2.347  | 0.0189   | *   |

Significant codes: 0 <= '\*\*\*' < 0.001 < '\*\*' < 0.01 < '\*' < 0.05

**Table S11** GLM output of final model for Gafftopsail Catfish.

| <i>Models</i> | <i>K</i> | <i>AICc</i> | <i>Delta_AICc</i> | <i>ModelLik</i> | <i>AICcWt</i> | <i>LL</i> | <i>Cum.Wt</i> |
|---------------|----------|-------------|-------------------|-----------------|---------------|-----------|---------------|
| model 1       | 11       | 143.408     | 0.0000            | 1.000           | 0.550         | -59.975   | 0.550         |
| model 2       | 10       | 143.810     | 0.402             | 0.818           | 0.450         | -61.301   | 0.999         |
| full          | 22       | 163.092     | 19.684            | 5.316e-05       | 2.924e-05     | -56.570   | 1.000         |

**Table S12** AICc table of logistic regression models for Red Drum.

|              | Estimate  | Standard Error | z value | Pr(> z ) |     |
|--------------|-----------|----------------|---------|----------|-----|
| (Intercept)  | 2,121.090 | 754.745        | 2.810   | 0.0049   | **  |
| fregionUpper | 3.818     | 0.824          | 4.632   | 0.0000   | *** |
| sal          | 0.143     | 0.168          | 0.854   | 0.3931   |     |
| temp         | -0.430    | 0.111          | -3.869  | 0.0001   | *** |
| sal:depth    | -0.041    | 0.020          | -2.108  | 0.0350   | *   |
| year:do      | 0.117     | 0.046          | 2.530   | 0.0114   | *   |
| year:depth   | 0.049     | 0.029          | 1.648   | 0.0994   |     |

Signif. codes: 0 <= '\*\*\*' < 0.001 < '\*\*' < 0.01 < '\*' < 0.05

**Table S13** GLM output of final model for Red Drum.

| <i>Models</i> | <i>K</i> | <i>AICc</i> | <i>Delta_AICc</i> | <i>ModelLik</i> | <i>AICcWt</i> | <i>LL</i> | <i>Cum.Wt</i> |
|---------------|----------|-------------|-------------------|-----------------|---------------|-----------|---------------|
| model 3       | 12       | 244.212     | 0.000             | 1.000           | 0.364         | -109.240  | 0.364         |
| model 2       | 13       | 244.437     | 0.225             | 0.894           | 0.325         | -108.202  | 0.689         |
| model 1       | 14       | 244.523     | 0.3109            | 0.856           | 0.311         | -107.082  | 0.999         |
| full          | 22       | 259.759     | 15.546            | 0.0004          | 0.0001        | -104.903  | 1.000         |

**Table S14** AICc table of logistic regression models for presence probability of Blacktip Sharks.

|                    | Estimate   | Standard Error | z value | Pr(> z ) |   |
|--------------------|------------|----------------|---------|----------|---|
| (Intercept)        | -2,223.559 | 1,233.375      | -1.803  | 0.0714   |   |
| fregionUpper:sal   | 0.097      | 0.049          | 1.965   | 0.0495   | * |
| fregionUpper:depth | -0.130     | 0.058          | -2.239  | 0.0252   | * |
| sal:depth          | -0.012     | 0.007          | -1.838  | 0.0661   |   |
| temp:year          | -0.040     | 0.022          | -1.830  | 0.0672   |   |
| temp:do            | 0.086      | 0.042          | 2.058   | 0.0395   | * |

Signif. codes: 0 <= '\*\*\*' < 0.001 < '\*\*' < 0.01 < '\*' < 0.05

**Table S15** GLM output of final model for Blacktip Shark



| <i>Models</i> | <i>K</i> | <i>AICc</i> | <i>Delta_AICc</i> | <i>ModelLik</i> | <i>AICcWt</i> | <i>LL</i> | <i>Cum.Wt</i> |
|---------------|----------|-------------|-------------------|-----------------|---------------|-----------|---------------|
| model 1       | 11       | 224.086     | 0.000             | 1.000           | 0.385         | -100.314  | 0.385         |
| model 2       | 10       | 224.520     | 0.434             | 0.805           | 0.310         | -101.655  | 0.696         |
| model 3       | 9        | 224.557     | 0.472             | 0.790           | 0.304         | -102.787  | 0.999         |
| full          | 22       | 245.455     | 21.369            | 2.289e-05       | 8.822e-06     | -97.751   | 1.000         |

**Table S16** AICc table of logistic regression models for Spinner Shark.

|              | Estimate   | Standard Error | z value | Pr(> z ) |    |
|--------------|------------|----------------|---------|----------|----|
| (Intercept)  | -3,427.568 | 1,623.236      | -2.112  | 0.0347   | *  |
| fregionUpper | 0.869      | 0.331          | 2.628   | 0.0086   | ** |
| depth        | 0.067      | 0.041          | 1.633   | 0.1025   |    |
| sal:do       | -0.029     | 0.014          | -2.002  | 0.0453   | *  |
| temp:year    | -0.059     | 0.028          | -2.078  | 0.0377   | *  |

Signif. codes: 0 <= '\*\*\*' < 0.001 < '\*\*' < 0.01 < '\*' < 0.05

**Table S17** GLM output of final model for Spinner Shark.

| <i>Models</i> | <i>K</i> | <i>AICc</i> | <i>Delta_AICc</i> | <i>ModelLik</i> | <i>AICcWt</i> | <i>LL</i> | <i>Cum.Wt</i> |
|---------------|----------|-------------|-------------------|-----------------|---------------|-----------|---------------|
| model 1       | 7        | 202.586     | 0.000             | 1.000           | 0.999         | -93.990   | 0.999         |
| full          | 22       | 230.119     | 27.533            | 1.050e-06       | 1.050e-06     | -90.083   | 1.000         |

**Table S18** AICc table of logistic regression models for Bull Shark.

|              | Estimate | Standard Error | z value | Pr(> z ) |     |
|--------------|----------|----------------|---------|----------|-----|
| (Intercept)  | -30.451  | 14.274         | -2.133  | 0.0329   | *   |
| fregionUpper | 1.401    | 0.356          | 3.941   | 0.0001   | *** |
| do           | 0.263    | 0.116          | 2.274   | 0.0230   | *   |
| depth        | -0.096   | 0.046          | -2.081  | 0.0374   | *   |
| sal:temp     | -0.031   | 0.015          | -2.018  | 0.0436   | *   |

Signif. codes: 0 <= '\*\*\*' < 0.001 < '\*\*' < 0.01 < '\*' < 0.05

**Table S19** GLM output of final model for Bull shark.
